# Supplementary material for: Homeostatic microglia initially seed and activated microglia later reshape amyloid plaques in Alzheimer’s Disease
Source: Springer Nature journal article supplement (doi:10.1038/s41467-024-54779-w), 2024-12-05
Supplement: 41467_2024_54779_MOESM1_ESM.pdf [file 41467_2024_54779_MOESM1_ESM.pdf]

**Homeostatic microglia initially seed and activated microglia  
later reshape amyloid plaques in Alzheimer's Disease**

**Supplementary Information**

## Supplementary Figures

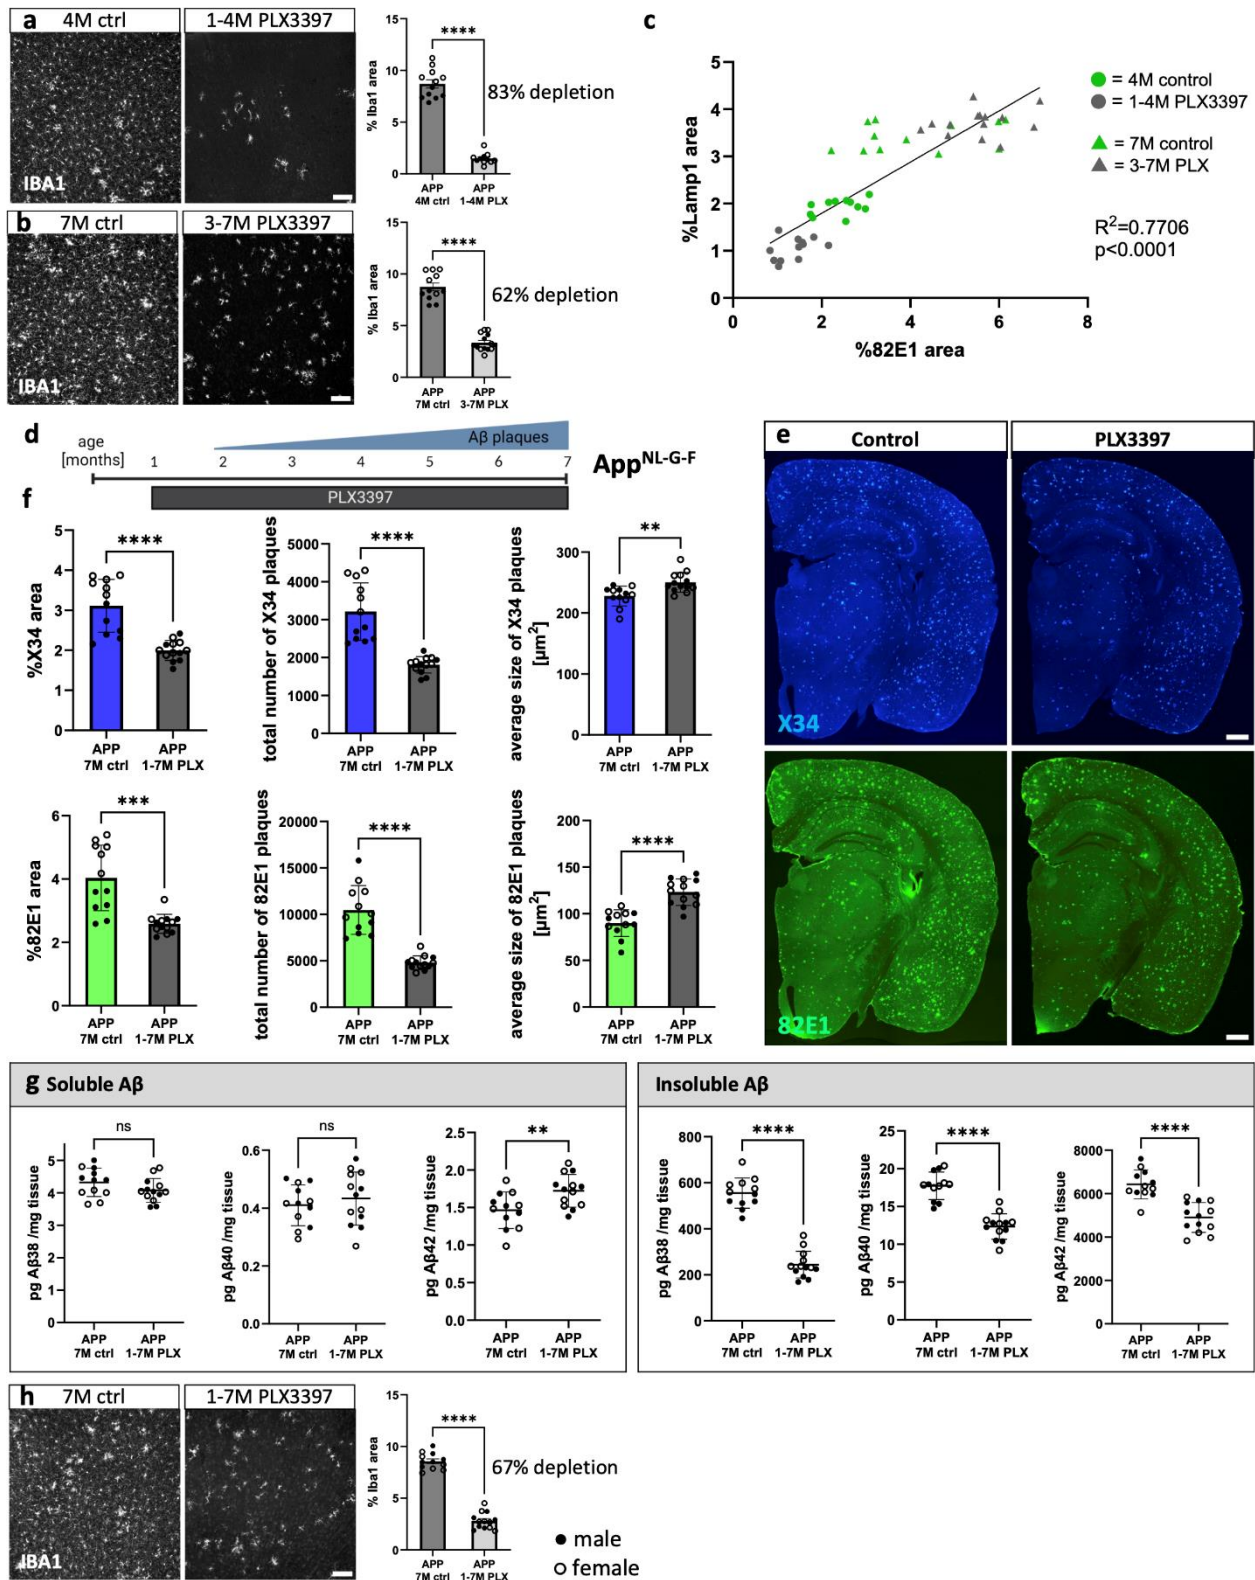

**Supplementary Fig. 1: Additional information on PLX3397-treatment in *App<sup>NL-G-F</sup>* mice. (a) Representative images and microglia depletion efficiency of early PLX3397-treatment in *App<sup>NL-G-F</sup>* mice (APP) (two-tailed t-**

test with Welch's correction,  $n(\text{ctrl})=12$ ,  $n(\text{PLX})=11$ ,  $p<0.0001$ ). **(b)** Representative images and quantification of microglia depletion efficiency of late PLX3397-treatment in  $App^{NL-G-F}$  mice (two-tailed t-test,  $n(\text{ctrl})=12$ ,  $n(\text{PLX})=14$ ,  $p<0.0001$ ). **(c)** Linear regression of 82E1<sup>+</sup> plaque staining and LAMP1<sup>+</sup> dystrophic neurite staining across early and late microglia depletion cohorts ( $R^2=0.7706$ ,  $p<0.0001$ ). **(d)** Treatment scheme for sustained microglia depletion.  $App^{NL-G-F}$  mice (APP) were fed PLX3397 from 1 month until 7 months of age (1-7M PLX) or control diet (7M ctrl). Created in BioRender. Cherretté, E. (2024) <https://BioRender.com/u17o338>. **(e)** Representative images of amyloid plaques in the brain, stained with X34 (fibrillar plaques) and 82E1 (total A $\beta$ ). **(f)** Image quantifications of X34<sup>+</sup> and 82E1<sup>+</sup> plaques in the whole brain (%X34 area: two-tailed t-test with Welch's correction,  $n(\text{ctrl})=12$ ,  $n(\text{PLX})=13$ ,  $p<0.0001$ ; total number of X34 plaques: two-tailed t-test with Welch's correction,  $n(\text{ctrl})=12$ ,  $n(\text{PLX})=13$ ,  $p<0.0001$ ; average size X34 plaques: two-tailed t-test,  $n(\text{ctrl})=12$ ,  $n(\text{PLX})=13$ ,  $p=0.0023$ ; %82E1 area: two-tailed t-test with Welch's correction,  $n(\text{ctrl})=12$ ,  $n(\text{PLX})=13$ ,  $p=0.0005$ ; total number of 82E1 plaques: two-tailed t-test with Welch's correction,  $n(\text{ctrl})=12$ ,  $n(\text{PLX})=13$ ,  $p<0.0001$ ; average size 82E1 plaques: two-tailed t-test,  $n(\text{ctrl})=12$ ,  $n(\text{PLX})=13$ ,  $p<0.0001$ ). **(g)** ELISA of amyloid levels in soluble and insoluble cortex extracts (sol. A $\beta$ 38: two-tailed t-test,  $n(\text{ctrl})=12$ ,  $n(\text{PLX})=13$ ,  $p=0.1392$ ; sol. A $\beta$ 40: two-tailed t-test,  $n(\text{ctrl})=12$ ,  $n(\text{PLX})=13$ ,  $p=0.4911$ ; sol. A $\beta$ 42: two-tailed t-test,  $n(\text{ctrl})=12$ ,  $n(\text{PLX})=13$ ,  $p=0.0098$ ; insol. A $\beta$ 38: two-tailed t-test,  $n(\text{ctrl})=12$ ,  $n(\text{PLX})=13$ ,  $p<0.0001$ ; insol. A $\beta$ 40: two-tailed t-test,  $n(\text{ctrl})=12$ ,  $n(\text{PLX})=13$ ,  $p<0.0001$ ; insol. A $\beta$ 42: two-tailed t-test,  $n(\text{ctrl})=12$ ,  $n(\text{PLX})=13$ ,  $p<0.0001$ ). **(h)** Representative images and quantification of microglia depletion efficiency after sustained PLX3397 treatment (two-tailed t-test,  $n(\text{ctrl})=12$ ,  $n(\text{PLX})=13$ ,  $p<0.0001$ ). White dots represent female mice and black dots represent male mice. Scale bars 100  $\mu\text{m}$  (a, b, h) and 500  $\mu\text{m}$  (e). All data is presented as mean  $\pm$  SD. \* $p\leq 0.05$ ; \*\* $p\leq 0.01$ ; \*\*\* $p\leq 0.001$ ; \*\*\*\* $p\leq 0.0001$ . Source data are provided as a Source Data file.

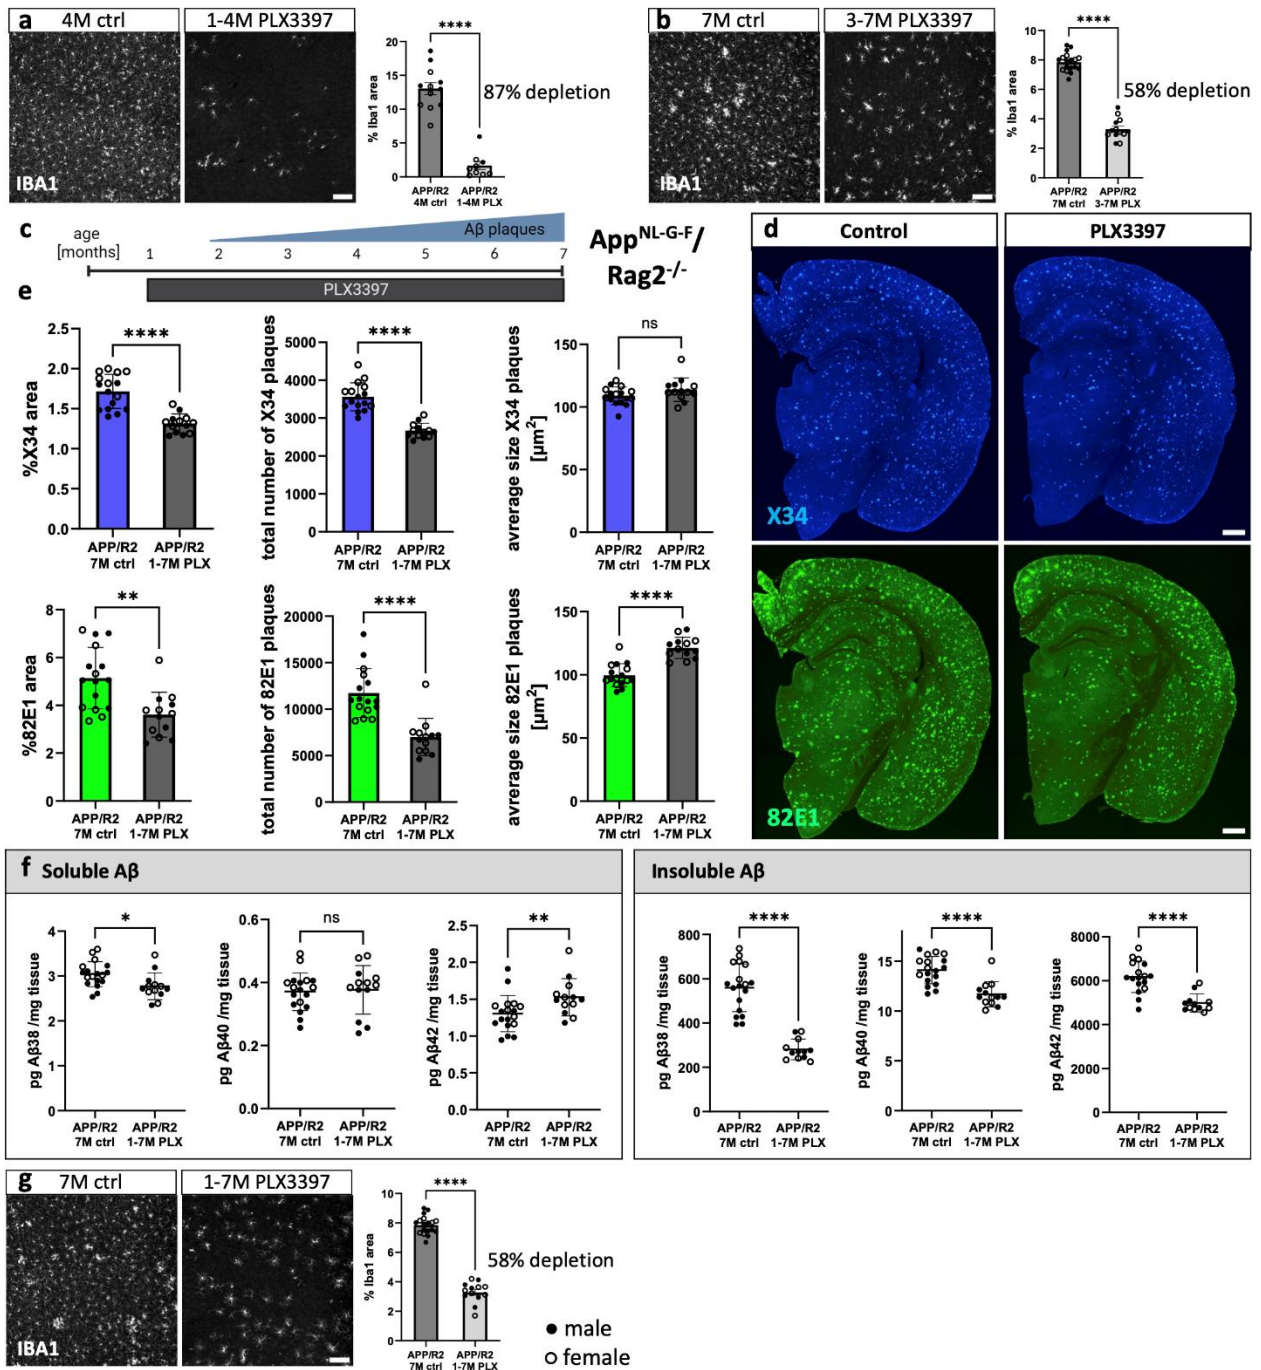

**Supplementary Fig. 2: Additional information on PLX3397-treatment in  $App^{NL-G-F}/Rag2^{-/-}$  mice.** (a) Microglia depletion efficiency of early PLX3397-treatment in  $App^{NL-G-F}/Rag2^{-/-}$  mice (APP/R2) (two-tailed t-test,  $n(\text{ctrl})=12$ ,  $n(\text{PLX})=9$ ,  $p<0.0001$ ). (b) Representative images and quantification of microglia depletion efficiency of late PLX3397-treatment in  $App^{NL-G-F}/Rag2^{-/-}$  mice (APP/R2) (two-tailed t-test,  $n(\text{ctrl})=18$ ,  $n(\text{PLX})=13$ ,  $p<0.0001$ ). (c) Treatment scheme for sustained microglia depletion.  $App^{NL-G-F}/Rag2^{-/-}$  mice (APP/R2) were fed PLX3397 from 1 month until 7 months of age (1-7M PLX) or control diet (7M ctrl). Created in BioRender. Cherretté, E. (2024) <https://BioRender.com/u17o338>. (d) Representative images of amyloid plaques in the brain, stained with X34 (fibrillar plaques) and 82E1 (total  $A\beta$ ). (e) Image quantifications of X34<sup>+</sup> and 82E1<sup>+</sup> plaques in the whole brain (%X34 area: two-tailed t-test,  $n(\text{ctrl})=16$ ,

n(PLX)=13,  $p < 0.0001$ ; total number of X34 plaques: two-tailed t-test with Welch's correction, n(ctrl)=16, n(PLX)=13,  $p < 0.0001$ ; average size X34 plaques: two-tailed t-test, n(ctrl)=16, n(PLX)=13,  $p = 0.1188$ ; %82E1 area: two-tailed t-test, n(ctrl)=16, n(PLX)=13,  $p = 0.0013$ ; total number of 82E1 plaques: two-tailed Mann-Whitney test, n(ctrl)=16, n(PLX)=13,  $p < 0.0001$ ; average size 82E1 plaques: two-tailed t-test, n(ctrl)=16, n(PLX)=13,  $p < 0.0001$ ). (f) ELISA of amyloid levels in soluble and insoluble cortex extracts (sol. A $\beta$ 38: two-tailed t-test, n(ctrl)=18, n(PLX)=13,  $p = 0.0146$ ; sol. A $\beta$ 40: two-tailed t-test, n(ctrl)=18, n(PLX)=13,  $p = 0.8164$ ; sol. A $\beta$ 42: two-tailed Mann-Whitney test, n(ctrl)=18, n(PLX)=13,  $p = 0.0073$ ; insol. A $\beta$ 38: two-tailed t-test with Welch's correction, n(ctrl)=18, n(PLX)=12,  $p < 0.0001$ ; insol. A $\beta$ 40: two-tailed t-test, n(ctrl)=18, n(PLX)=13,  $p < 0.0001$ ; insol. A $\beta$ 42: two-tailed t-test, n(ctrl)=17, n(PLX)=12,  $p < 0.0001$ ). (g) Representative images and quantification of microglia depletion efficiency after sustained PLX3397 treatment (two-tailed t-test, n(ctrl)=18, n(PLX)=13,  $p < 0.0001$ ). White dots represent female mice and black dots represent male mice. Scale bars 100  $\mu\text{m}$  (a, b, g) and 500  $\mu\text{m}$  (d). All data is presented as mean  $\pm$  SD. \* $p \leq 0.05$ ; \*\* $p \leq 0.01$ ; \*\*\* $p \leq 0.001$ ; \*\*\*\* $p \leq 0.0001$ . Source data are provided as a Source Data file.

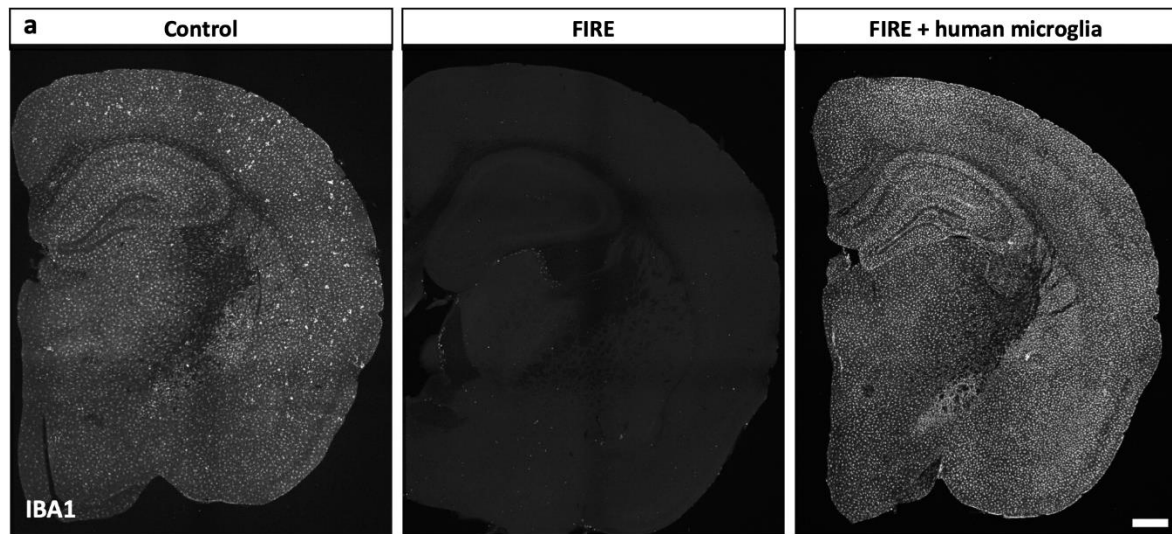

**b** 3-month-old human microglia-grafted FIRE mice

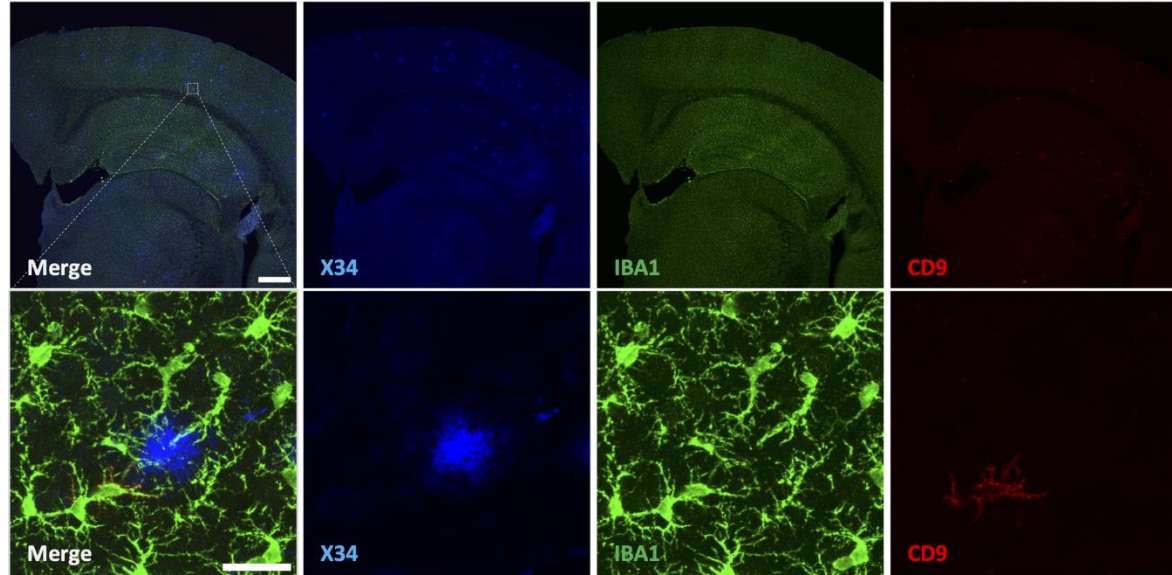

**c** 6-month-old human microglia-grafted FIRE mice

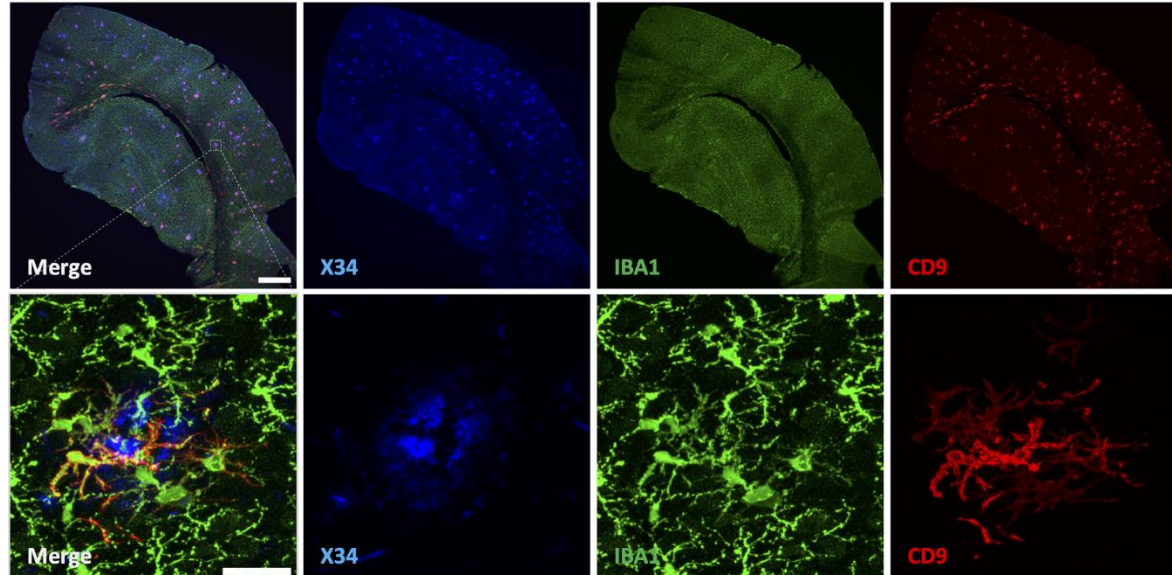

**Supplementary Fig. 3: Human microglia grafted into FIRE mice populate the whole brain and upregulate the DAM marker CD9 around amyloid plaques.** (a) Images of microglia in the brain of control mice ( $App^{NL-G-F}; Rag2^{-/-}; IL2rg^{-/-}; hCSF1^{KI}$ , with mouse microglia), FIRE mice ( $App^{NL-G-F}; Rag2^{-/-}; IL2rg^{-/-}; hCSF1^{KI}; Csf1r^{\Delta FIRE/\Delta FIRE}$ , no microglia), and FIRE mice xenotransplanted with human microglia. (b-c) Overview and higher magnification images of human grafted microglia at 3 months (b) and 6 months (c) around amyloid plaques stained with IBA1 and the DAM marker CD9. Scale bars 500  $\mu m$  (a,b,c) and 30  $\mu m$  (b,c lower panel).

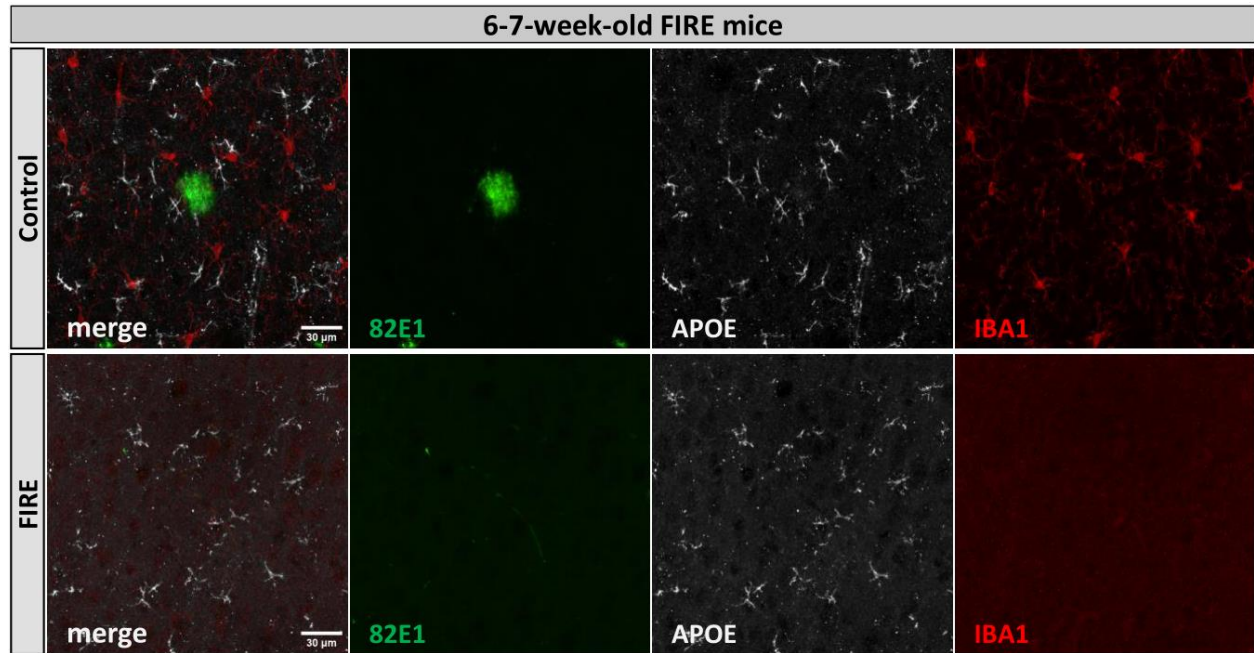

**Supplementary Fig. 4: In 6-7-week-old control and FIRE mice, APOE expression is driven by non-microglial cells.** Representative images of amyloid plaques, APOE, and microglia in the brain of 6-7-week-old control mice ( $App^{NL-G-F}; Rag2^{-/-}; IL2rg^{-/-}; hCSF1^{KI}$ , with mouse microglia) and FIRE mice ( $App^{NL-G-F}; Rag2^{-/-}; IL2rg^{-/-}; hCSF1^{KI}; Csf1r^{\Delta FIRE/\Delta FIRE}$ , no microglia). Scale bars 30 $\mu$ m.



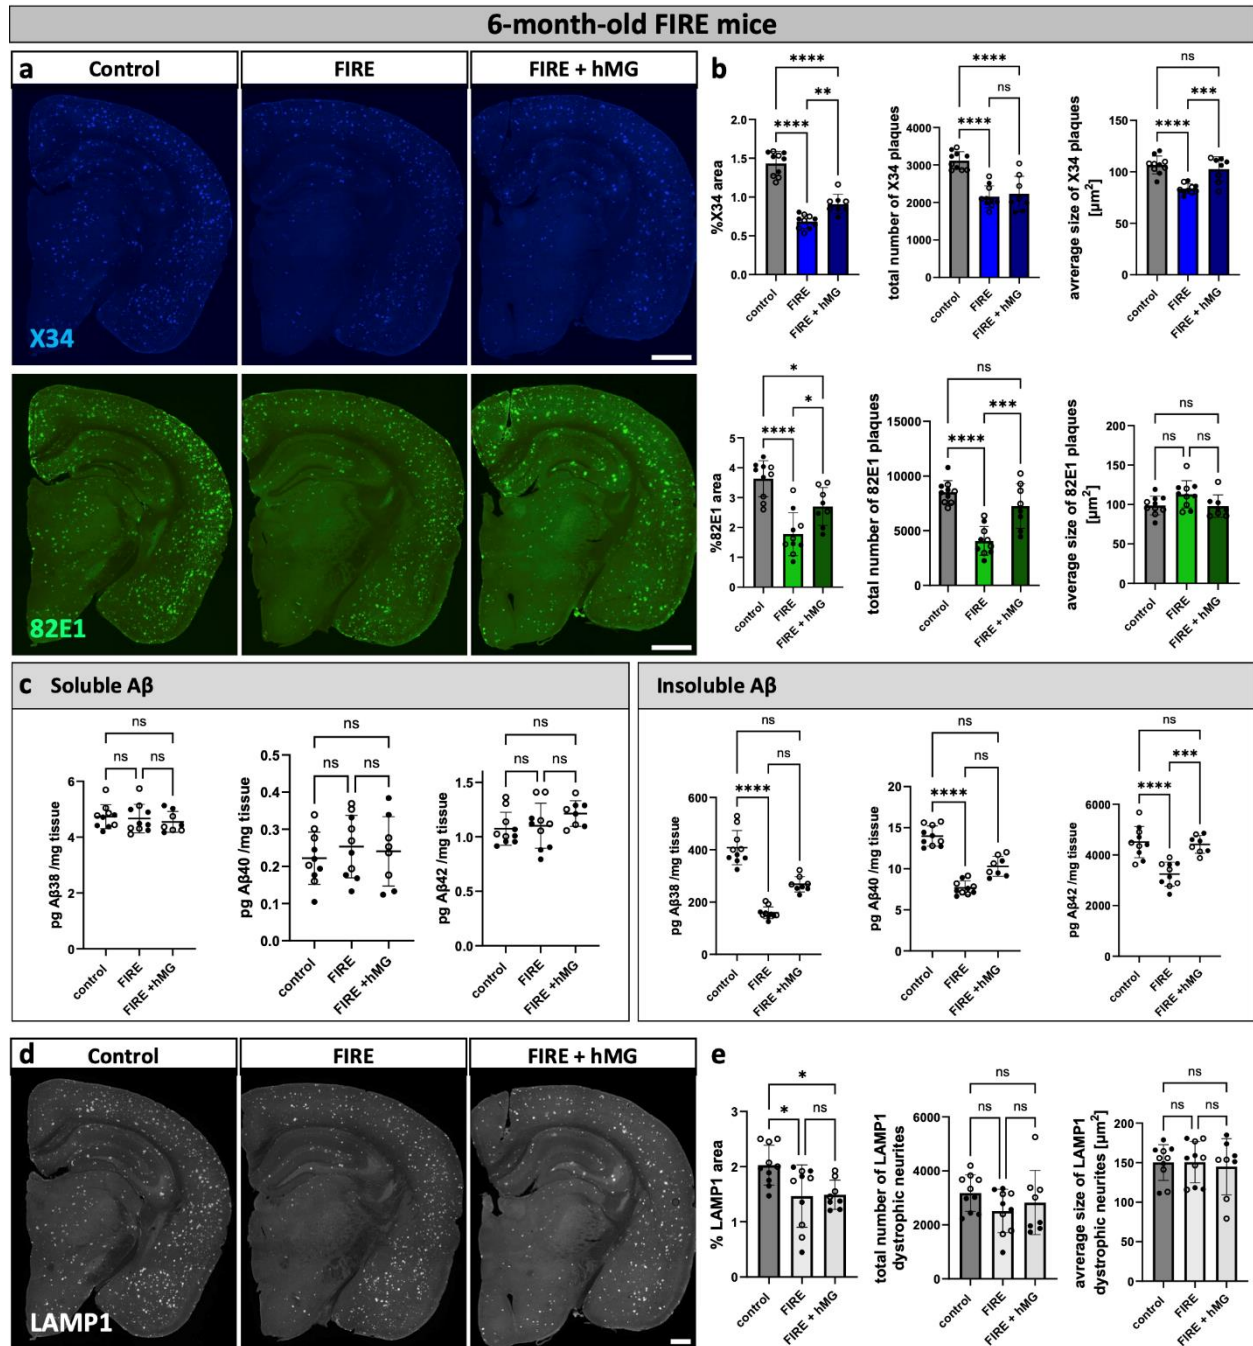

**Supplementary Fig. 5: Reduced plaque burden in 6-month-old FIRE mice and rescue by human microglia transplantation.** (a) Images of X34<sup>+</sup> and 82E1<sup>+</sup> amyloid plaques in the whole brain of control mice (*App<sup>NL-G-F</sup>; Rag2<sup>-/-</sup>; IL2rg<sup>-/-</sup>; hCSF1<sup>KI</sup>*, with mouse microglia), FIRE mice (*App<sup>NL-G-F</sup>; Rag2<sup>-/-</sup>; IL2rg<sup>-/-</sup>; hCSF1<sup>KI</sup>; Csf1 <sup>$\Delta$ FIRE/ $\Delta$ FIRE</sup>*, no microglia), and xenografted FIRE mice (FIRE + hMG, human microglia). (b) Image quantifications of amyloid plaques in the whole brain (%X34 area: one-way ANOVA, n(ctrl)=10, n(FIRE)=10, n(FIRE + hMG)=8,  $p < 0.0001$ ; total number of X34 plaques: one-way ANOVA, n(ctrl)=10, n(FIRE)=10, n(FIRE + hMG)=8,  $p < 0.0001$ ; average size X34 plaques: one-way ANOVA, n(ctrl)=10, n(FIRE)=10, n(FIRE + hMG)=8,  $p < 0.0001$ ; %82E1 area: one-way ANOVA, n(ctrl)=10, n(FIRE)=10, n(FIRE + hMG)=8,  $p < 0.0001$ ; total number of 82E1 plaques: one-way ANOVA, n(ctrl)=10, n(FIRE)=10, n(FIRE + hMG)=8,  $p < 0.0001$ ; average size 82E1 plaques: one-way ANOVA, n(ctrl)=10, n(FIRE)=10, n(FIRE + hMG)=8,  $p = 0.0594$ ). (c) ELISA of soluble and

insoluble A $\beta$  levels in the cortex (sol. A $\beta$ 38: one-way Kruskal-Wallis test, n(ctrl)=10, n(FIRE)=10, n(FIRE +hMG)=8, p=0.6434; sol. A $\beta$ 40: one-way ANOVA, n(ctrl)=10, n(FIRE)=10, n(FIRE +hMG)=8, p=0.6971; sol. A $\beta$ 42: one-way ANOVA, n(ctrl)=10, n(FIRE)=10, n(FIRE +hMG)=8, p=0.2007; insol. A $\beta$ 38: one-way Kruskal-Wallis test, n(ctrl)=10, n(FIRE)=10, n(FIRE +hMG)=8, p<0.0001; insol. A $\beta$ 40: one-way Kruskal-Wallis test, n(ctrl)=10, n(FIRE)=10, n(FIRE +hMG)=8, p<0.0001; insol. A $\beta$ 42: one-way ANOVA, n(ctrl)=10, n(FIRE)=10, n(FIRE +hMG)=8, p<0.0001). (d) Images of LAMP1<sup>+</sup> dystrophic neurites in the whole brain. (e) Image quantifications LAMP1<sup>+</sup> dystrophic neurites in the whole brain (%LAMP1 area: one-way ANOVA, n(ctrl)=10, n(FIRE)=10, n(FIRE +hMG)=8, p=0.0118; total number of LAMP1 dystrophic neurites: one-way ANOVA, n(ctrl)=10, n(FIRE)=10, n(FIRE +hMG)=8, p=0.2678; average size of LAMP1 dystrophic neurites: one-way Kruskal-Wallis test, n(ctrl)=10, n(FIRE)=10, n(FIRE +hMG)=8, p=0.8563). White dots represent female mice and black dots represent male mice. Scale bars 500  $\mu$ m (a,d). All data is presented as mean  $\pm$  SD. \*p $\leq$ 0.05; \*\*p $\leq$ 0.01; \*\*\*p $\leq$ 0.001; \*\*\*\*p $\leq$ 0.0001. Source data are provided as a Source Data file.

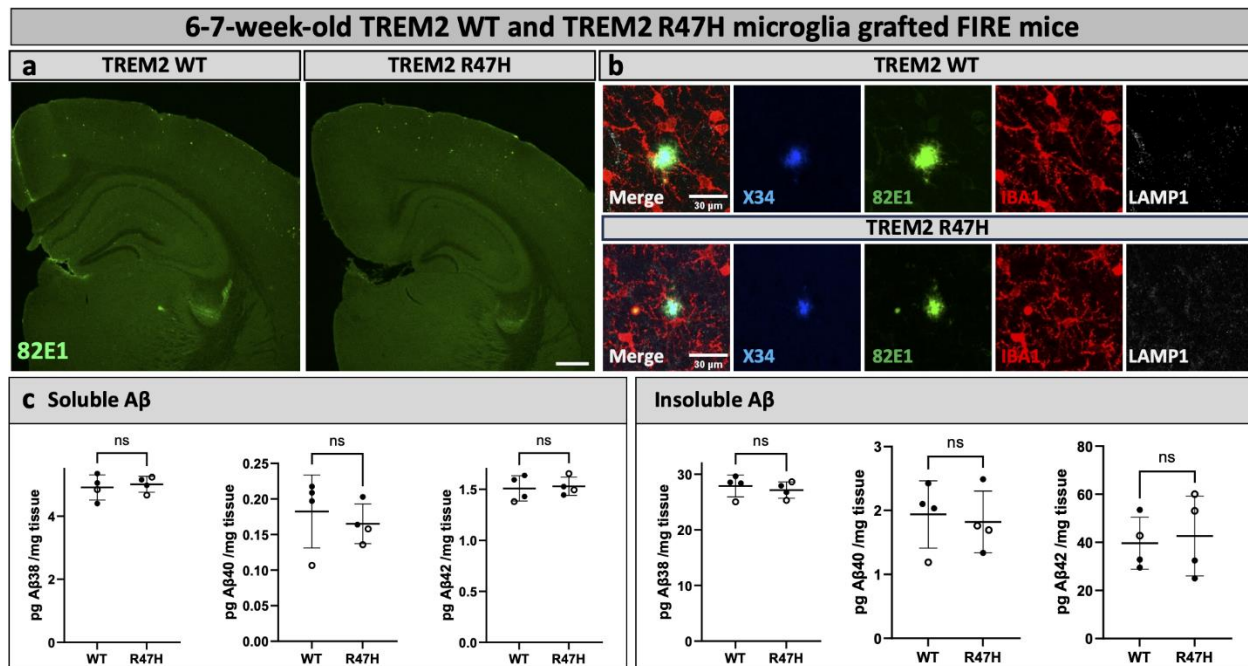

**Supplementary Fig. 6: Amyloid pathology in 6-7-week-old FIRE mice transplanted with wildtype and *TREM2*<sup>R47H/R47H</sup> human microglia.** FIRE mice (*App*<sup>NL-G-F</sup>; *Rag2*<sup>-/-</sup>; *IL2rg*<sup>-/-</sup>; *hCSF1*<sup>KI</sup>; *Csf1r*<sup>ΔFIRE/ΔFIRE</sup>) were xenotransplanted with human WT microglia (WT) and human microglia harboring the *Trem2*<sup>R47H/R47H</sup> (R47H) risk gene at P4 and analyzed at 6-7 weeks of age. (a) Overview images of amyloid plaques in the cortex of WT and R47H microglia grafted mice. (b) Higher magnification images on amyloid plaques, surrounded by human microglia. Early amyloid plaques do not yet show LAMP1<sup>+</sup> dystrophic neurites. (c) ELISA of soluble and insoluble Aβ extracts of the cortex (sol. Aβ38: two-tailed t-test, n(WT)=4, n(R47H)=13, p=0.6948; sol. Aβ40: two-tailed t-test, n(WT)=4, n(R47H)=13, p=0.5737; sol. Aβ42: two-tailed t-test, n(WT)=4, n(R47H)=13, p=0.7904; insol. Aβ38: two-tailed t-test, n(WT)=4, n(R47H)=13, p=0.5686; insol. Aβ40: two-tailed t-test, n(WT)=4, n(R47H)=13, p=0.7534; insol. Aβ42: two-tailed t-test, n(WT)=4, n(R47H)=13, p=0.7714). White dots represent female mice and black dots represent male mice. Scale bars 500 μm (a) and 30 μm (b). All data is presented as mean ± SD. Source data are provided as a Source Data file.

## Supplementary Table

| Study                                                            | Mouse model                                                       | Treatment                                        | Depletion efficiency                            | Effect on plaque load                                                                                                                                                                                         | Explained |
|------------------------------------------------------------------|-------------------------------------------------------------------|--------------------------------------------------|-------------------------------------------------|---------------------------------------------------------------------------------------------------------------------------------------------------------------------------------------------------------------|-----------|
| <b>APP/PS1</b> (plaque deposition from ~1.5 months)              |                                                                   |                                                  |                                                 |                                                                                                                                                                                                               |           |
| Grathwohl et al., 2009 <sup>1</sup>                              | <i>APP/PS1; CD11b-<br/>HSVTK</i>                                  | 6-9 weeks<br>or 5-6M<br>GCV                      | 90-95%                                          | <b>Histology (6-9 weeks):</b> <u>no change</u> in Congo Red amyloid plaques<br><b>Aβ Western Blot (5-6M):</b> <u>no change</u><br><b>Histology (5-6M):</b> <u>no change</u> in Congo Red amyloid plaques      | yes       |
| Olmos-Alonso et al., 2016 <sup>2</sup>                           | <i>APP/PS1</i>                                                    | 6-9M<br>GW2580                                   | 30%                                             | <b>Soluble Aβ ELISA:</b> <u>no change</u><br><b>Histology:</b> <u>no change</u> in number of 6E10 <sup>+</sup> amyloid plaques in cortex                                                                      | yes       |
| Unger et al., 2018 <sup>3</sup>                                  | <i>APP/PS1</i>                                                    | 12-13M<br>PLX5622                                | 70-90%                                          | <b>Histology:</b> <u>no change</u> in number or mean area of Thioflavin+ plaques in hippocampus and cortex                                                                                                    | yes       |
| Zhao et al., 2017 <sup>4</sup>                                   | <i>Cx3cr1<sup>CreER/+</sup>; R26<sup>DTR/+</sup>;<br/>APP/PS1</i> | Diphtheria<br>toxin at<br>15M,                   | 99%,<br>repopulation<br>in 2 <sup>nd</sup> week | <b>Intravital time-lapse imaging:</b> <u>no changes</u> in the number of Congo Red <sup>+</sup> Aβ plaques,<br>but an <u>increase in size</u>                                                                 | yes       |
| <b>5xFAD</b> (plaque deposition from ~2 months)                  |                                                                   |                                                  |                                                 |                                                                                                                                                                                                               |           |
| Spangenberg et al., 2019 <sup>5</sup>                            | <i>5xFAD</i>                                                      | 1.5- 4M or<br>1.5-7M<br>PLX5622,<br>repopulation | 97–100%                                         | <b>Aβ ELISA:</b> no changes in soluble or insoluble Aβ or Aβ42<br><b>Histology:</b> <u>reduced</u> Thio-S <sup>+</sup> and 6E10 <sup>+</sup> plaque number and volume<br>Increased CAA in Cortex and thalamus | yes       |
| Delizannis et al., 2021 <sup>6</sup>                             | <i>5xFAD<br/>with AD-Tau<br/>injection</i>                        | 1.5M-6M<br>PLX3397                               | 92%                                             | <b>Histology:</b> <u>reduced</u> NAB228 <sup>+</sup> Aβ signal in the cortex (layers 4-6),<br>but not subiculum<br>Reduced plaque size in layers 4-6 of the cortex                                            | yes       |
| Sosna et al., 2018 <sup>7</sup>                                  | <i>5xFAD</i>                                                      | 2-5M<br>PLX3397                                  | 99%                                             | <b>Histology:</b> <u>reduction</u> of 6E10 <sup>+</sup> amyloid area and size                                                                                                                                 | yes       |
| Shabestari et al., 2022 <sup>8</sup>                             | <i>5xFAD; FIRE</i>                                                | 0 – 5M or<br>0-6M                                | 100%                                            | <b>Aβ ELISA:</b> reduced insoluble Aβ40 and 42, no change in soluble Aβ<br><b>Histology:</b> <u>reduced</u> parenchymal plaques (AmyloGlo) in cortex,<br>hippocampus, and Thalamus, increased CAA,            | yes       |
| Casali et al., 2020 <sup>9</sup>                                 | <i>5xFAD</i>                                                      | 4-5M<br>PLX5622,<br>repopulation                 | 50%                                             | <b>Histology:</b> Slightly <u>reduced</u> 6E10 area in the thalamus, not in<br>other brain regions<br><u>increased diffuse-like plaques</u> and fewer compact-like plaques                                    | partially |
| Son et al., 2020 <sup>10</sup>                                   | <i>5xFAD</i>                                                      | 9-10M<br>PLX3397                                 | 50%                                             | <b>Histology:</b> <u>reduced</u> 6E10 Aβ deposition<br><b>Western Blot:</b> decreased APP levels CTFβ, and Aβ in the cortex                                                                                   | no        |
| Spangenberg et al., 2016 <sup>11</sup>                           | <i>5xFAD</i>                                                      | 10-11M<br>PLX3397                                | 90%                                             | <b>Aβ ELISA:</b> <u>no change</u> in soluble or insoluble Aβ levels<br><b>Histology:</b> <u>no change</u> in Thio-S <sup>+</sup> and 6E10 <sup>+</sup> plaque numbers or size                                 | yes       |
| <b>App<sup>NL-G-F</sup></b> (plaque deposition from ~1.5 months) |                                                                   |                                                  |                                                 |                                                                                                                                                                                                               |           |
| Benitez et al., 2021 <sup>12</sup>                               | <i>App<sup>NL-G-F</sup></i>                                       | 1.5-3.5M<br>PLX5622                              | nearly all<br>microglia<br>depleted             | <b>Histology:</b> <u>reduction</u> in LCO <sup>+</sup> plaque density of small plaques<br>(hippocampus),                                                                                                      | yes       |
| Clayton et al., 2021 <sup>13</sup>                               | <i>App<sup>NL-G-F</sup> (with AAV-<br/>P301L-tau injection)</i>   | 4M-6M<br>PLX5622                                 | nearly all<br>microglia<br>depleted             | <b>Histology:</b> <u>increased</u> Thio-S area, number of plaques, and average<br>size of plaques<br>Increased 4G8 area and plaque size                                                                       | yes       |

**Supplementary Table 1: Overview of microglia depletion studies in amyloid mice.** This table summarizes the studies investigating the effect of microglia depletion on amyloid plaques. References, mouse model used, type of treatment and timing, microglia depletion efficiency, effect on amyloid plaques, and whether or not the results can be explained with our findings are indicated. Gray highlights indicate minor details that do not align with our observations.

## Supplementary References

1. Grathwohl, S. A. *et al.* Formation and maintenance of Alzheimer's disease  $\beta$ -amyloid plaques in the absence of microglia. *Nat Neurosci* 12, 1361–1363 (2009).
2. Olmos-Alonso, A. *et al.* Pharmacological targeting of CSF1R inhibits microglial proliferation and prevents the progression of Alzheimer's-like pathology. *Brain* 139, 891–907 (2016).
3. Unger, M. S., Schernthaner, P., Marschallinger, J., Mrowetz, H. & Aigner, L. Microglia prevent peripheral immune cell invasion and promote an anti-inflammatory environment in the brain of APP-PS1 transgenic mice. *J Neuroinflammation* 15, (2018).
4. Zhao, R., Hu, W., Tsai, J., Li, W. & Gan, W. B. Microglia limit the expansion of  $\beta$ -amyloid plaques in a mouse model of Alzheimer's disease. *Mol Neurodegener* 12, (2017).
5. Spangenberg, E. *et al.* Sustained microglial depletion with CSF1R inhibitor impairs parenchymal plaque development in an Alzheimer's disease model. *Nat Commun* 10, 1–21 (2019).
6. Delizannis, A. T. *et al.* Effects of microglial depletion and TREM2 deficiency on A $\beta$  plaque burden and neuritic plaque tau pathology in 5XFAD mice. *Acta Neuropathol Commun* 9, (2021).
7. Sosna, J. *et al.* Early long-term administration of the CSF1R inhibitor PLX3397 ablates microglia and reduces accumulation of intraneuronal amyloid, neuritic plaque deposition and pre-fibrillar oligomers in 5XFAD mouse model of Alzheimer's disease. *Mol Neurodegener* 13, 1–11 (2018).
8. Kiani Shabestari, S. *et al.* Absence of microglia promotes diverse pathologies and early lethality in Alzheimer's disease mice. *Cell Rep* 39, (2022).
9. Casali, B. T., MacPherson, K. P., Reed-Geaghan, E. G. & Landreth, G. E. Microglia depletion rapidly and reversibly alters amyloid pathology by modification of plaque compaction and morphologies. *Neurobiol Dis* 142, 104956 (2020).
10. Son, Y. *et al.* Inhibition of colony-stimulating factor 1 receptor by plx3397 prevents amyloid beta pathology and rescues dopaminergic signaling in aging 5xfad mice. *Int J Mol Sci* 21, 1–14 (2020).
11. Spangenberg, E. E. *et al.* Eliminating microglia in Alzheimer's mice prevents neuronal loss without modulating amyloid- $\beta$  pathology. *Brain* 139, 1265–1281 (2016).
12. Benitez, D. P. *et al.* Knock-in models related to Alzheimer's disease: synaptic transmission, plaques and the role of microglia. *Mol Neurodegener* 16, (2021).
13. Clayton, K. *et al.* Plaque associated microglia hyper-secrete extracellular vesicles and accelerate tau propagation in a humanized APP mouse model. *Mol Neurodegener* 16, (2021).
