# Supplementary material for: Homeostatic microglia initially seed and activated microglia later reshape amyloid plaques in Alzheimer’s Disease
Source: Springer Nature journal article supplement (doi:10.1038/s41467-024-54779-w), 2024-12-05
Supplement: 41467_2024_54779_MOESM2_ESM.pdf [file 41467_2024_54779_MOESM2_ESM.pdf]

## Reporting Summary

Nature Portfolio wishes to improve the reproducibility of the work that we publish. This form provides structure for consistency and transparency in reporting. For further information on Nature Portfolio policies, see our [Editorial Policies](#) and the [Editorial Policy Checklist](#).

### Statistics

For all statistical analyses, confirm that the following items are present in the figure legend, table legend, main text, or Methods section.

- | n/a                                 | Confirmed                                                                                                                                                                                                                                                                                      |
|-------------------------------------|------------------------------------------------------------------------------------------------------------------------------------------------------------------------------------------------------------------------------------------------------------------------------------------------|
| <input type="checkbox"/>            | <input checked="" type="checkbox"/> The exact sample size ( $n$ ) for each experimental group/condition, given as a discrete number and unit of measurement                                                                                                                                    |
| <input type="checkbox"/>            | <input checked="" type="checkbox"/> A statement on whether measurements were taken from distinct samples or whether the same sample was measured repeatedly                                                                                                                                    |
| <input type="checkbox"/>            | <input checked="" type="checkbox"/> The statistical test(s) used AND whether they are one- or two-sided<br><i>Only common tests should be described solely by name; describe more complex techniques in the Methods section.</i>                                                               |
| <input checked="" type="checkbox"/> | <input type="checkbox"/> A description of all covariates tested                                                                                                                                                                                                                                |
| <input type="checkbox"/>            | <input checked="" type="checkbox"/> A description of any assumptions or corrections, such as tests of normality and adjustment for multiple comparisons                                                                                                                                        |
| <input type="checkbox"/>            | <input checked="" type="checkbox"/> A full description of the statistical parameters including central tendency (e.g. means) or other basic estimates (e.g. regression coefficient) AND variation (e.g. standard deviation) or associated estimates of uncertainty (e.g. confidence intervals) |
| <input type="checkbox"/>            | <input checked="" type="checkbox"/> For null hypothesis testing, the test statistic (e.g. $F$ , $t$ , $r$ ) with confidence intervals, effect sizes, degrees of freedom and $P$ value noted<br><i>Give <math>P</math> values as exact values whenever suitable.</i>                            |
| <input checked="" type="checkbox"/> | <input type="checkbox"/> For Bayesian analysis, information on the choice of priors and Markov chain Monte Carlo settings                                                                                                                                                                      |
| <input checked="" type="checkbox"/> | <input type="checkbox"/> For hierarchical and complex designs, identification of the appropriate level for tests and full reporting of outcomes                                                                                                                                                |
| <input checked="" type="checkbox"/> | <input type="checkbox"/> Estimates of effect sizes (e.g. Cohen's $d$ , Pearson's $r$ ), indicating how they were calculated                                                                                                                                                                    |

*Our web collection on [statistics for biologists](#) contains articles on many of the points above.*

### Software and code

Policy information about [availability of computer code](#)

Data collection

Data analysis

For manuscripts utilizing custom algorithms or software that are central to the research but not yet described in published literature, software must be made available to editors and reviewers. We strongly encourage code deposition in a community repository (e.g. GitHub). See the Nature Portfolio [guidelines for submitting code & software](#) for further information.

### Data

Policy information about [availability of data](#)

All manuscripts must include a [data availability statement](#). This statement should provide the following information, where applicable:

- Accession codes, unique identifiers, or web links for publicly available datasets
- A description of any restrictions on data availability
- For clinical datasets or third party data, please ensure that the statement adheres to our [policy](#)

## Research involving human participants, their data, or biological material

Policy information about studies with [human participants or human data](#). See also policy information about [sex, gender \(identity/presentation\), and sexual orientation](#) and [race, ethnicity and racism](#).

|                                                                    |                                                |
|--------------------------------------------------------------------|------------------------------------------------|
| Reporting on sex and gender                                        | No human participants were used in this study. |
| Reporting on race, ethnicity, or other socially relevant groupings | Not applicable.                                |
| Population characteristics                                         | Not applicable.                                |
| Recruitment                                                        | Not applicable.                                |
| Ethics oversight                                                   | Not applicable.                                |

Note that full information on the approval of the study protocol must also be provided in the manuscript.

## Field-specific reporting

Please select the one below that is the best fit for your research. If you are not sure, read the appropriate sections before making your selection.

Life sciences       Behavioural & social sciences       Ecological, evolutionary & environmental sciences

For a reference copy of the document with all sections, see [nature.com/documents/nr-reporting-summary-flat.pdf](https://www.nature.com/documents/nr-reporting-summary-flat.pdf)

## Life sciences study design

All studies must disclose on these points even when the disclosure is negative.

|                 |                                                                                                                                                                                                                                                                                                                                                                                                                                                                                                                  |
|-----------------|------------------------------------------------------------------------------------------------------------------------------------------------------------------------------------------------------------------------------------------------------------------------------------------------------------------------------------------------------------------------------------------------------------------------------------------------------------------------------------------------------------------|
| Sample size     | Sample size was estimated based on previous experiments performed in the lab. To calculate the number of mice needed for IF and MSD ELISA, sample size we conducted a priori power analyses using G*Power (sample size noted throughout the test). The expected effect size was based on previous publications or, when possible, data previously generated in the lab. Alpha level and power were set at 5% and 80%, respectively, and the statistical model used for the sample size calculation was a t-test. |
| Data exclusions | A few data points were excluded from the study due to damaged samples or technical errors. All excluded data point and reasons for exclusion is indicated in the source data files.                                                                                                                                                                                                                                                                                                                              |
| Replication     | Experiments have been performed independently. We reproduced the same findings in independent experiments and different mouse strains (immunocompetent and immunodeficient), and with pharmacological and genetic manipulation. Our data can explain previous findings in the literature.                                                                                                                                                                                                                        |
| Randomization   | Animals were randomly assigned to conditions and conditions to account for potential ordering effects. To avoid litter bias in the mouse experiments, experimental groups were composed of animals from different litters randomly distributed. Both sexes were used at similar ratios.                                                                                                                                                                                                                          |
| Blinding        | The investigators were not blinded during data collection and analysis. Blinding was not necessary because image analysis was performed semi-automated or fully automated (when possible).                                                                                                                                                                                                                                                                                                                       |

## Reporting for specific materials, systems and methods

We require information from authors about some types of materials, experimental systems and methods used in many studies. Here, indicate whether each material, system or method listed is relevant to your study. If you are not sure if a list item applies to your research, read the appropriate section before selecting a response.

### Materials & experimental systems

| n/a                                 | Included in the study                                           |
|-------------------------------------|-----------------------------------------------------------------|
| <input type="checkbox"/>            | <input checked="" type="checkbox"/> Antibodies                  |
| <input type="checkbox"/>            | <input checked="" type="checkbox"/> Eukaryotic cell lines       |
| <input checked="" type="checkbox"/> | <input type="checkbox"/> Palaeontology and archaeology          |
| <input type="checkbox"/>            | <input checked="" type="checkbox"/> Animals and other organisms |
| <input checked="" type="checkbox"/> | <input type="checkbox"/> Clinical data                          |
| <input checked="" type="checkbox"/> | <input type="checkbox"/> Dual use research of concern           |
| <input checked="" type="checkbox"/> | <input type="checkbox"/> Plants                                 |

### Methods

| n/a                                 | Included in the study                           |
|-------------------------------------|-------------------------------------------------|
| <input checked="" type="checkbox"/> | <input type="checkbox"/> ChIP-seq               |
| <input checked="" type="checkbox"/> | <input type="checkbox"/> Flow cytometry         |
| <input checked="" type="checkbox"/> | <input type="checkbox"/> MRI-based neuroimaging |

## Antibodies

|                 |                                                                                                                                                                                                                                                                                                                                                                                                                                                                                                                                                                                                                                                                                                                                                                                                                                                                                                                                                                                                                                                                                                                                                                                                                                                                                                                                                                                                                                                                                                                                                                                                                                                                                                                                                                                                                                                                                                                                                                                                                                                                                                                                                                                                                                                                                                                                                    |
|-----------------|----------------------------------------------------------------------------------------------------------------------------------------------------------------------------------------------------------------------------------------------------------------------------------------------------------------------------------------------------------------------------------------------------------------------------------------------------------------------------------------------------------------------------------------------------------------------------------------------------------------------------------------------------------------------------------------------------------------------------------------------------------------------------------------------------------------------------------------------------------------------------------------------------------------------------------------------------------------------------------------------------------------------------------------------------------------------------------------------------------------------------------------------------------------------------------------------------------------------------------------------------------------------------------------------------------------------------------------------------------------------------------------------------------------------------------------------------------------------------------------------------------------------------------------------------------------------------------------------------------------------------------------------------------------------------------------------------------------------------------------------------------------------------------------------------------------------------------------------------------------------------------------------------------------------------------------------------------------------------------------------------------------------------------------------------------------------------------------------------------------------------------------------------------------------------------------------------------------------------------------------------------------------------------------------------------------------------------------------------|
| Antibodies used | <p>Mouse anti-Human Amyloid<math>\beta</math> (N) (82E1) (1/200, IBL, Cat#10323, clone 820)<br/> Rabbit anti-Iba1 (1/200, WAKO, Cat#019-19741)<br/> Guinea pig anti-Iba1 (1/500, Synaptic Systems, Cat#234 308, clone Gp311H9)<br/> Rat anti-Lamp1 (1/500, Santa Cruz, Cat#sc-19992, 1D4B)<br/> Rabbit anti-ubiquitin (1/250, Abcam, Cat#ab134953, clone EPR8830 )<br/> Mouse anti-human CD9 (1/500, BioLegend, Cat#312102, clone HI9a)<br/> Rabbit anti-human P2RY12 (1/500, Atlas antibodies, Cat#HPA014518)<br/> Goat anti-APOE (1/1000, Chemicon International, Cat#AB947)<br/> Donkey anti-mouse Alexa Fluor 488 (1/500, Invitrogen, Cat#A21202)<br/> Donkey anti-rabbit Alexa Fluor 594 (1/500, Invitrogen, Cat#A21207)<br/> Donkey anti-rat Alexa Fluor 647 (1/500, Abcam, Cat#ab150155)<br/> Donkey anti-rabbit Alexa Fluor 488 (1/500, Invitrogen, Cat#A21206)<br/> Donkey anti-mouse Alexa Fluor 594 (1/500, Invitrogen, Cat#A21203)<br/> Donkey anti-guinea pig Cy5 (1/500, Jackson Immunolabs, Cat#706-175-148)<br/> Donkey anti-goat Alexa Fluor 647 (1/500, Invitrogen, Cat#A21447)<br/> LTDA-38 (A<math>\beta</math> ELISA capture antibodies generated in the lab)<br/> LTDA-40 (A<math>\beta</math> ELISA capture antibodies generated in the lab)<br/> LTDA-42 (A<math>\beta</math> ELISA capture antibodies generated in the lab)<br/> LTDA-hA<math>\beta</math>N (A<math>\beta</math> ELISA detection antibodies generated in the lab)</p>                                                                                                                                                                                                                                                                                                                                                                                                                                                                                                                                                                                                                                                                                                                                                                                                                                                                                     |
| Validation      | <p>Mouse anti-Human Amyloid<math>\beta</math> (N) (82E1): validated in Horikoshi Y, et al. Development of Abeta terminal end-specific antibodies and sensitive ELISA for Abeta variant. Biochem Biophys Res Commun. 2004 Jul 2;319(3):733-7<br/> Rabbit anti-Iba1: Validated by the company by IHC on mouse brain sections..<br/> Guinea pig anti-Iba1: Validated by the company by IHC on rat, mouse and human brain sections.<br/> Rat anti-Lamp1 : Validated by IHC by McNiven Laboratory, Mayo Clinic, Rochester, on AML12 mouse hepatocyte cells. Hughes EN, August JT. Characterization of plasma membrane proteins identified by monoclonal antibodies. J Biol Chem. 1981 Jan 25;256(2):664-71.<br/> Rabbit anti-Ubiquitin : Validated in mouse liver tissue.<br/> Mouse anti-human CD9: Validated on the BT474 breast cancer cell line.<br/> Rabbit anti-human P2RY12: Validated by the company by IHC on sections of human cerebral cortex and liver tissue.<br/> Donkey anti-APOE: Validated by several papers listed by the company.<br/> LTDA-hA<math>\beta</math>N; Recombinant mouse monoclonal antibody with epitope at first 7 residues of human A<math>\beta</math>; requires <math>\beta</math>-cleavage of APP to recognize human APP-<math>\beta</math>-CTF and A<math>\beta</math> 1-X. Antibody is tested for human A<math>\beta</math> (western blot and ELISA) and <math>\beta</math>-CTF(western blot), control rodent A<math>\beta</math> and <math>\beta</math>-CTF are not recognized.<br/> LTDA-38; Recombinant mouse monoclonal antibody recognizes the carboxy terminus of A<math>\beta</math>38, doesn't recognize A<math>\beta</math>37, A<math>\beta</math>40 or A<math>\beta</math>42 (ELISA). It reacts equally potent to rodent A<math>\beta</math>38.<br/> LTDA-40; Recombinant mouse monoclonal antibody recognizes the carboxy terminus of A<math>\beta</math>40, doesn't recognize A<math>\beta</math>37, A<math>\beta</math>38 nor A<math>\beta</math>42 (ELISA). It reacts equally potent to rodent A<math>\beta</math>40.<br/> LTDA-42; Recombinant mouse monoclonal antibody recognizes the carboxy terminus of A<math>\beta</math>42, doesn't recognize A<math>\beta</math>37, A<math>\beta</math>38 nor A<math>\beta</math>40 (ELISA). It reacts equally potent to rodent A<math>\beta</math>42</p> |

## Eukaryotic cell lines

Policy information about [cell lines and Sex and Gender in Research](#)

|                                                                   |                                                                                                                                                                                                                                                                                                |
|-------------------------------------------------------------------|------------------------------------------------------------------------------------------------------------------------------------------------------------------------------------------------------------------------------------------------------------------------------------------------|
| Cell line source(s)                                               | H9 (WA09)/ WiCell Research Institute / RRID:CVCL_9773, female<br>H9-TREM2R47H / TREM2R47H / KUL Stem Cell Institute / Claes et al., 2019                                                                                                                                                       |
| Authentication                                                    | Cell lines were authenticated by the providers by Karyotyping and whole genome sequencing, and have been tested for pluripotency ( <a href="https://hpscereg.eu/cell-line/WAe009-A">https://hpscereg.eu/cell-line/WAe009-A</a> ). The H9-TREM2R47H linewas tested for chromosomal alterations. |
| Mycoplasma contamination                                          | All cell lines tested negative at least 3 times for Mycoplasma contamination.                                                                                                                                                                                                                  |
| Commonly misidentified lines (See <a href="#">ICLAC</a> register) | None of the cell lines used in this study is known to be cross-contaminated or otherwise misidentified, and is not listed in the Register of Misidentified Cell Lines from ICLAC.                                                                                                              |

## Animals and other research organisms

Policy information about [studies involving animals; ARRIVE guidelines](#) recommended for reporting animal research, and [Sex and Gender in Research](#)

|                    |                                                                                                                                                                                                                                                                                                                   |
|--------------------|-------------------------------------------------------------------------------------------------------------------------------------------------------------------------------------------------------------------------------------------------------------------------------------------------------------------|
| Laboratory animals | <p>Mouse, Apptm3.1Tcs, 4-7 months of age<br/> Mouse; Apptm3.1Tcs;Rag2tm1.1Cgn, 4-7 months of age<br/> Mouse; Rag2tm1.1Flv; Csf1tm1(CSF1)Flv; Il2rgtm1.1Flv;Apptm3.1Tcs, 6 weeks-6 months of age<br/> Mouse; Rag2tm1.1Flv; Csf1tm1(CSF1)Flv; Il2rgtm1.1Flv; Apptm3.1Tcs; Csf1Rem1Bdes, 6 weeks-6 months of age</p> |
| Wild animals       | No wild animals were used                                                                                                                                                                                                                                                                                         |

|                         |                                                                                                                                                                                               |
|-------------------------|-----------------------------------------------------------------------------------------------------------------------------------------------------------------------------------------------|
| Reporting on sex        | Experimental groups were balanced in terms of the sex of the mice.<br>Data points from male and female mice are indicated in the graphs with black and white dots respectively.               |
| Field-collected samples | No field-collected samples were used in this study.                                                                                                                                           |
| Ethics oversight        | Animal experiments were approved by the local Ethical Committee of Laboratory Animals of the KU Leuven (government licence LA1210579 and project P125/2022) following local and EU guideline. |

Note that full information on the approval of the study protocol must also be provided in the manuscript.

## Plants

---

|                       |                 |
|-----------------------|-----------------|
| Seed stocks           | Not applicable. |
| Novel plant genotypes | Not applicable. |
| Authentication        | Not applicable. |
